# Supplementary material
Source: PubMed Central journal article supplement (PMC3948288)
Supplement: 1222474110_sapp.pdf [file 1222474110_sapp.pdf]

# Supplemental information

## Constraints and potentials of future irrigation water availability on agricultural production under climate change

Joshua Elliott, Delphine Deryng, Christoph Muller, Katja Frieler, Markus Konzmann, Dieter Gerten, Michael Glotter, Martina Florke, Yoshihide Wada, Neil Best, Stephanie Eisner, Balazs M. Fekete, Christian Folberth, Ian Foster, Simon N. Gosling, Ingjerd Haddeland, Nikolay Khabarov, Fulco Ludwig, Yoshimitsu Masaki, Stefan Olin, Cynthia Rosenzweig, Alex C. Ruane, Yusuke Satoh, Erwin Schmid, Tobias Stacke, Qihong Tang, and Dominik Wisser

### Models

**Table S1:** GGCM models contributing the present analysis along with the primary contact for this work and institutional affiliation.

| Crop model | Institution               | # crops | Contact            |
|------------|---------------------------|---------|--------------------|
| pDSSAT     | University of Chicago     | 4       | Joshua Elliott     |
| PEGASUS    | University of East Anglia | 3       | Delphine Deryng    |
| GEPIC      | EAWAG                     | 4       | Christian Folberth |
| LPJmL      | PIK                       | 13      | Christoph Müller   |
| LPJ-GUESS  | Lunds University          | 4       | Stefan Olin        |
| EPIC       | Boku/ IIASA               | 15      | Erwin Schmid       |

**Table S2:** GHM models contributing the present analysis along with the primary contact for this work and institutional affiliation.

| Water model | Institution                                        | PirrUse? | Contact                          |
|-------------|----------------------------------------------------|----------|----------------------------------|
| LPJmL       | PIK                                                | Yes      | Dieter Gerten/<br>Markus Konzman |
| VIC         | Norwegian Water Resources and Energy Directorate   | Yes      | Ingjerd Haddeland                |
| H08         | National Institute for Environmental Studies Japan | Yes      | Yoshimitsu Masaki                |
| WaterGAP    | Kassel University                                  | Yes      | Martina Flörke                   |
| MacPDM      | University of Reading/<br>University of Nottingham | No       | Simon N. Gosling                 |
| WBM         | CUNY                                               | Yes      | Balazs Fekete                    |
| MPI-HM      | Max-Plank-Inst. For Meteorology                    | Yes      | Tobias Stacke                    |
| PCR-GLOBWB  | Utrecht University                                 | Yes      | Yoshihide Wada                   |
| DBH         | IGSNRR, China                                      | No       | Qihuong Tang                     |
| MATSIRO     | University of Tokyo                                | No       | Yusuke Satoh                     |

### Parameterizations of irrigation event algorithms

Most of the models participating use a method that can be summarized in terms of 4 parameters:

1. IMDEP: depth of soil moisture considered
2. ITHRL: critical lower soil moisture threshold to trigger irrigation event
3. ITHRU: upper soil moisture threshold to stop irrigation
4. IREFF: irrigation application efficiency

EPIC-type models use the following parameterization

1. BIR: water stress in crop to trigger automatic irrigation
2. EFI: irrigation efficiency - runoff from irrigation water
3. VIMX: maximum of annual irrigation volume
4. ARMX: maximum of single irrigation volume allowed
5. ARMN: minimum of single irrigation volume allowed

**Table S3:** Irrigation parameters for GGCMs.

| Model         | IMDEP (cm)       | ITHRL (%) | ITHRU (%) | IREFF (%)           |
|---------------|------------------|-----------|-----------|---------------------|
| pDSSAT        | 40               | 80        | 100       | 75                  |
| pDSSAT (rice) | 30               | 50        | 100       | 100                 |
| LPJmL         | 300 <sup>1</sup> | 90        | 100       | Varies <sup>2</sup> |
| PEGASUS       | 40               | 90        | 100       | 100                 |
| LPJ-GUESS     | 200 <sup>1</sup> | 90        | 100       | 100                 |

**Table S4:** Irrigation parameters for EPIC-based GGCMs.

| Model  | BIR (%) | EFI (%) | VIMX (mm) | ARMX (mm) | ARMN (mm) |
|--------|---------|---------|-----------|-----------|-----------|
| EPIC   | 90      | 100     | 500       | 50        | 20        |
| GEPIEC | 90      | 100     | 2000      | 1000      | 0.01      |

### Estimating global PlrrUse from for all crops from GGCM outputs

For this analysis we consider 16 of the most important global crop types (including grass/pasture). Because of the extreme diversity of global agriculture however, it is not possible to include all crops that are important for irrigation in all regions. In total, the 16 crops simulated by at least one global crop model account for 85.5% of the global irrigated areas recorded in MIRCA2000. For the remaining crop-types, which are dominated by the general categories “Others annual” and “Others perennial,” we assume areas equipped for irrigation demand irrigation according to the *median* irrigation demand among the seven simulated crops that constitute the highest total fraction of global irrigation (Fig. S1). Table S5 shows a detailed breakdown of the crops simulated, the number of models used to simulate each, and the fraction of global irrigated area in all MIRCA land-cover types (simulated or not).

**Table S5:** Fraction of global irrigated area (according to MIRCA 2000) in each of the simulated (by at least one global crop model) and non-simulated crop-types represented in MIRCA.

| Simulated (# GGCMs) |       |     | Not simulated   |       |
|---------------------|-------|-----|-----------------|-------|
| Rice                | 0.247 | (5) | Other annual    | 0.061 |
| Wheat               | 0.227 | (6) | Other perennial | 0.049 |
| Maize               | 0.115 | (6) | Potatoes        | 0.014 |
| Cotton              | 0.062 | (1) | Citrus          | 0.013 |
| Fodder grasses      | 0.045 | (2) | Vine            | 0.006 |
| Sugar cane          | 0.039 | (2) | Date palm       | 0.003 |
| Soybeans            | 0.023 | (6) | Rye             | 0.001 |
| Pulses*             | 0.021 | (2) | Coffee          | 0.001 |
| Barley              | 0.017 | (1) | Cocoa           | 0     |
| Peanuts             | 0.014 | (2) | Oil palm        | 0     |
| Canola              | 0.013 | (2) |                 |       |
| Sorghum             | 0.013 | (1) |                 |       |
| Millet              | 0.007 | (2) |                 |       |
| Sugar beet          | 0.006 | (1) |                 |       |
| Sunflower           | 0.005 | (2) |                 |       |
| Cassava             | 0     | (2) |                 |       |

\* LPJmL simulates ‘field pea’ and EPIC simulates ‘dry bean’; here we consider these both as representing general legumes

<sup>1</sup> LPJ-type models use a root-access weighted mean soil moisture down to a depth of 3m.

<sup>2</sup> LPJmL uses country specific values for IREFF, ranging between 29.4% (e.g. Mexico, Pakistan, etc.) and 85.5% (e.g. Israel, Jordan etc.). These consist of a conveyance efficiency (transporting to the field) and a field application efficiency [cite <http://www.pik-potsdam.de/research/publications/pikreports/summary-report-no-104>].

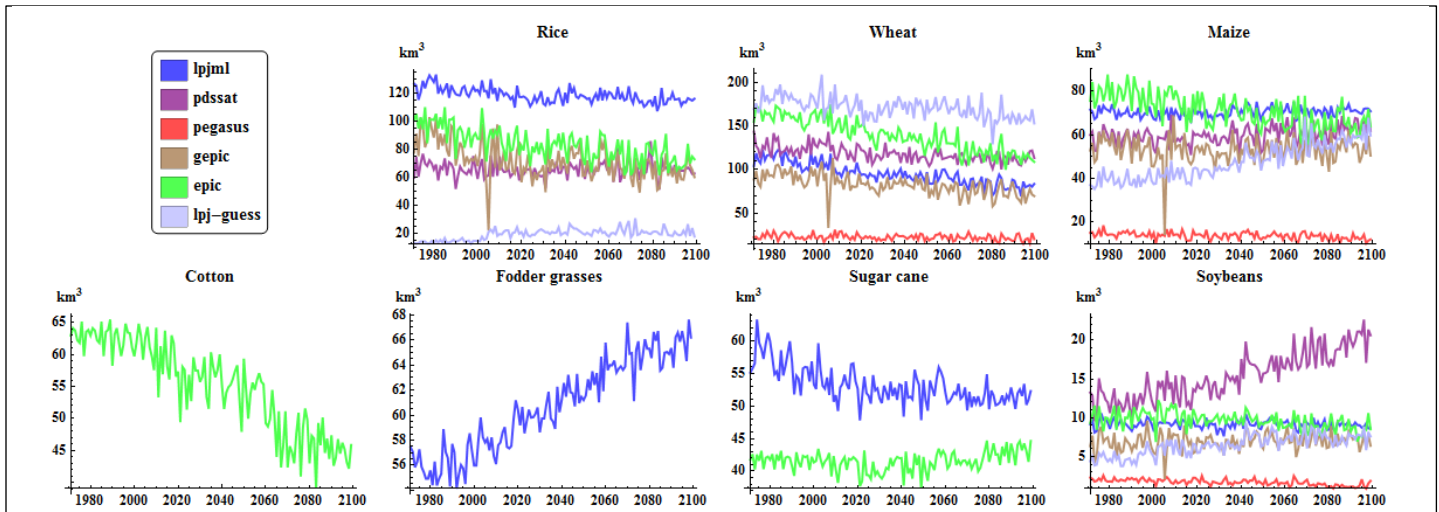

**Figure S1:** Global PrrUse from 1971-2099 for the top 6 irrigated annual crops and perennial grasses. All six GCMs are shown for HadGEM2-ES, RCP 8.5.

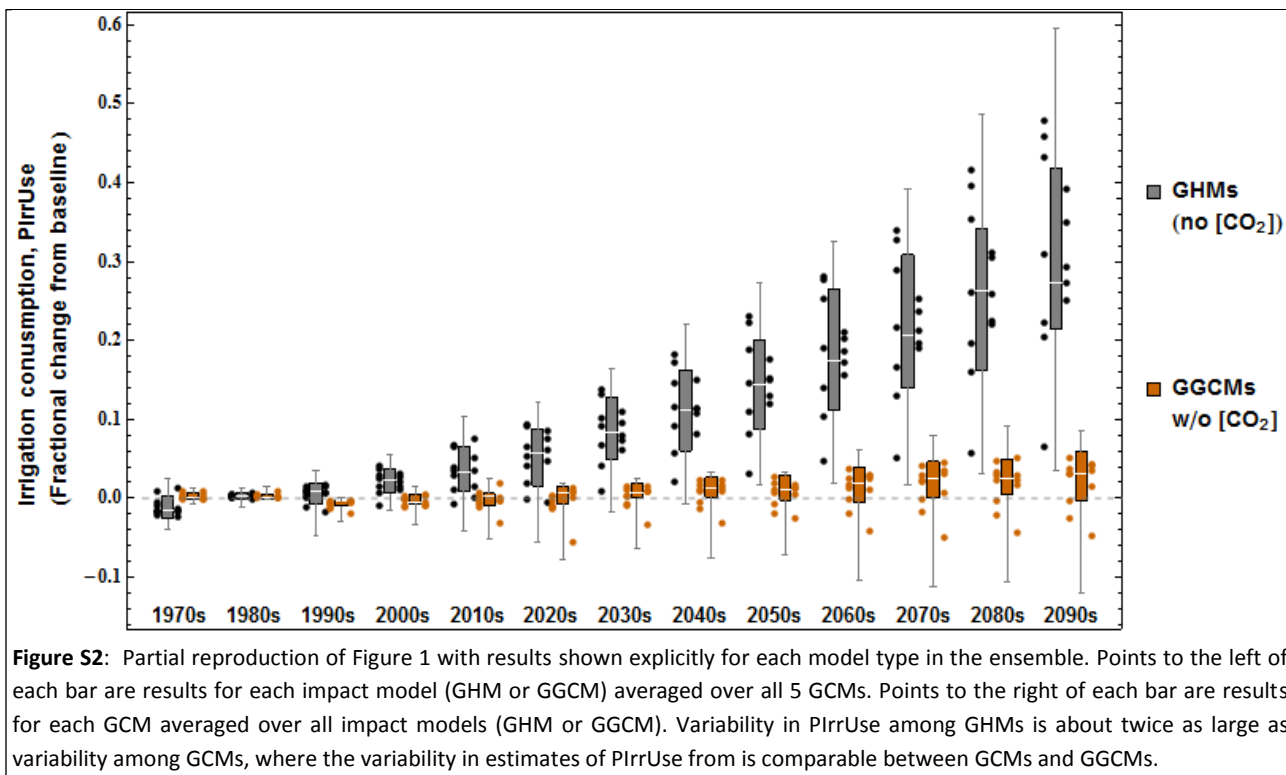

**Figure S2:** Partial reproduction of Figure 1 with results shown explicitly for each model type in the ensemble. Points to the left of each bar are results for each impact model (GHM or GGCM) averaged over all 5 GCMs. Points to the right of each bar are results for each GCM averaged over all impact models (GHM or GGCM). Variability in PrrUse among GHMs is about twice as large as variability among GGCMs, where the variability in estimates of PrrUse from is comparable between GCMs and GGCMs.

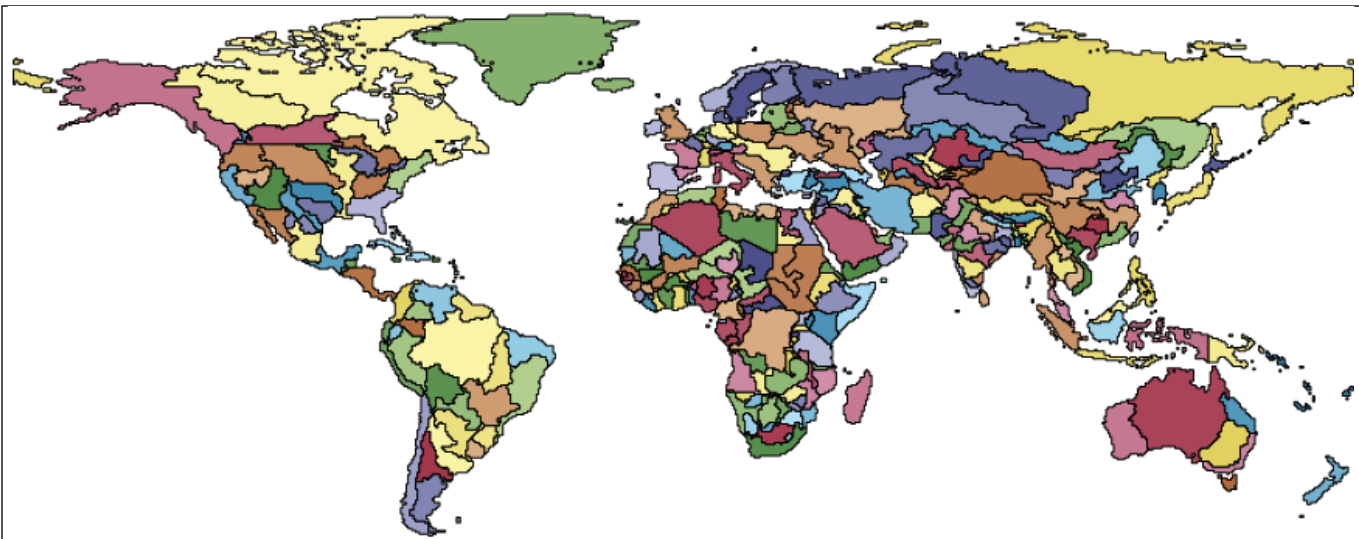

Figure S3: Map of 309 global food producing units (FPUs), composites of river basins and economic regions following Cai and Rosegrant (2002) with modifications by Kummu et al. (2010).

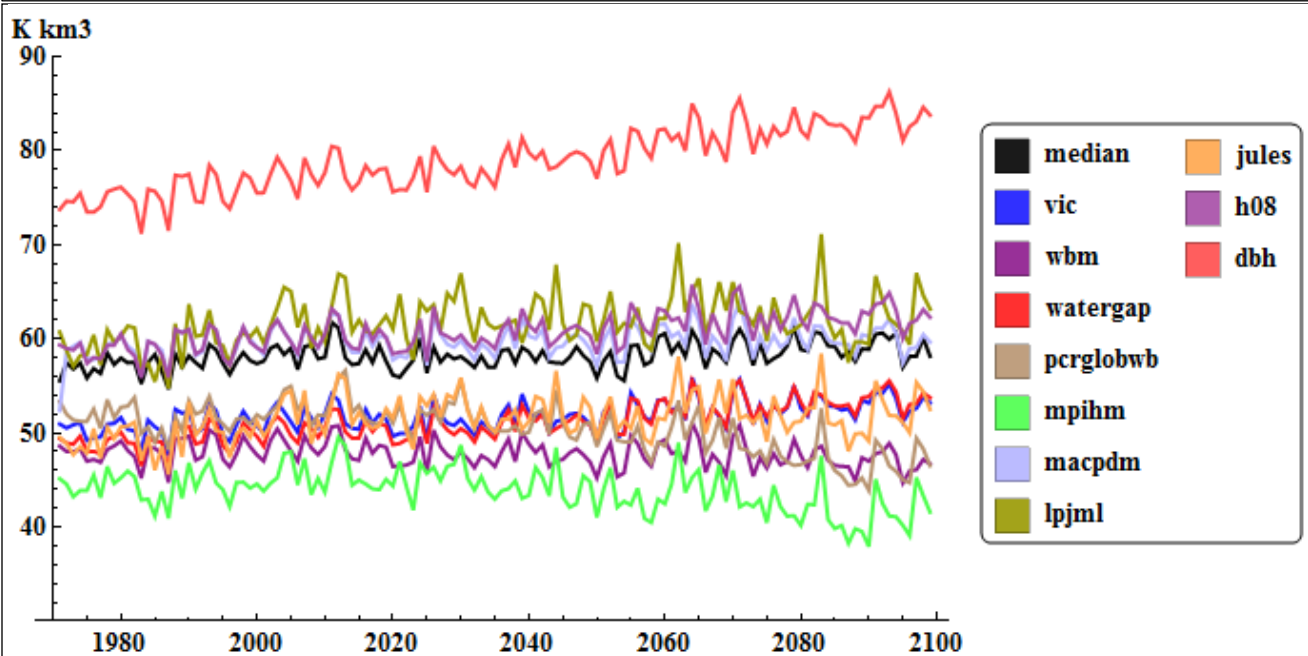

Fig S4: Global total blue water runoff from 11 water models averaged over all GCMs/ RCP8.5.

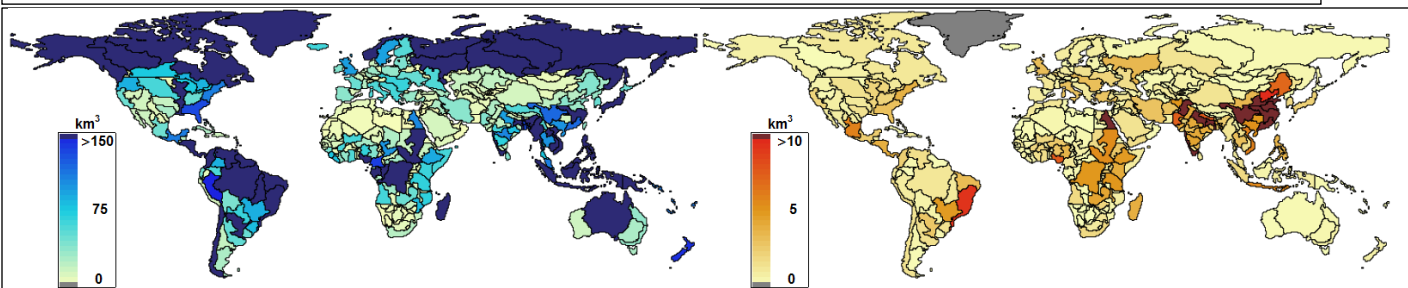

Figure S5: **Left:** end-of-century (2070-2099) renewable water available for human use (median of all GCM × GHM combinations) assuming 40% of available blue water runoff is potentially extractable for human use. **Right:** end-of-century demand for water for non-agricultural human uses, including domestic, industrial, energy generation, and livestock sector water demand under SSP2, as estimated by WaterGAP.

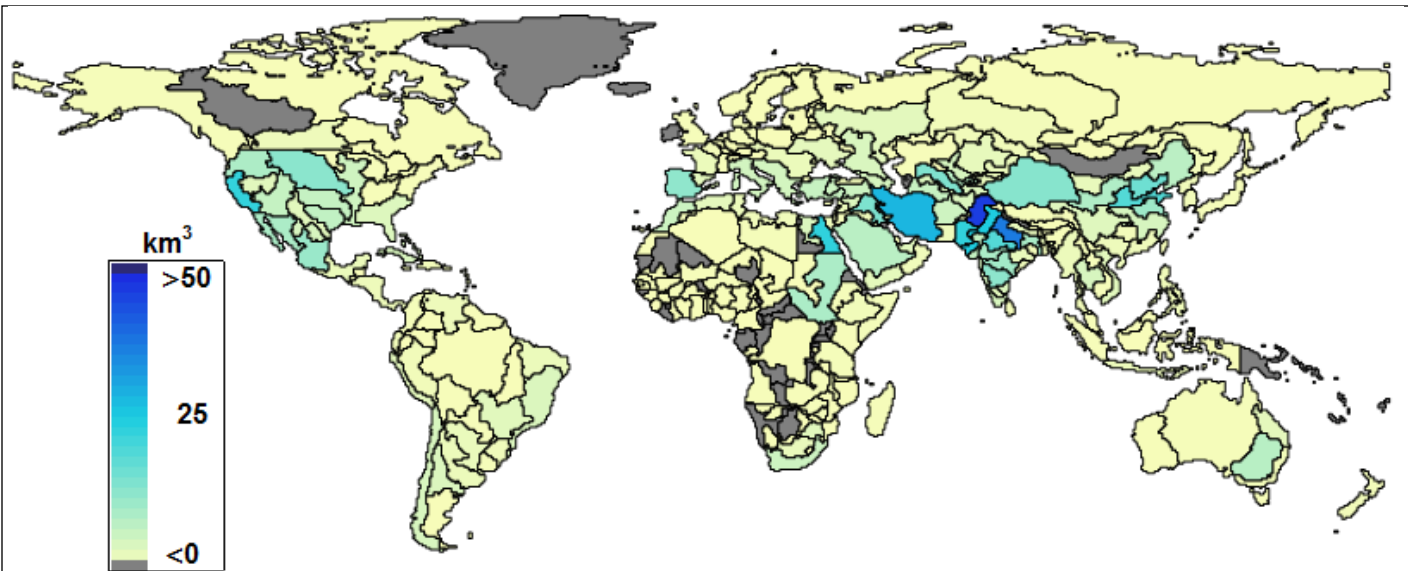

Fig S6: Total PlrrUse for each FPU for the median of all 30 GCM  $\times$  GGCM combinations over the historical period, 1980-2010.

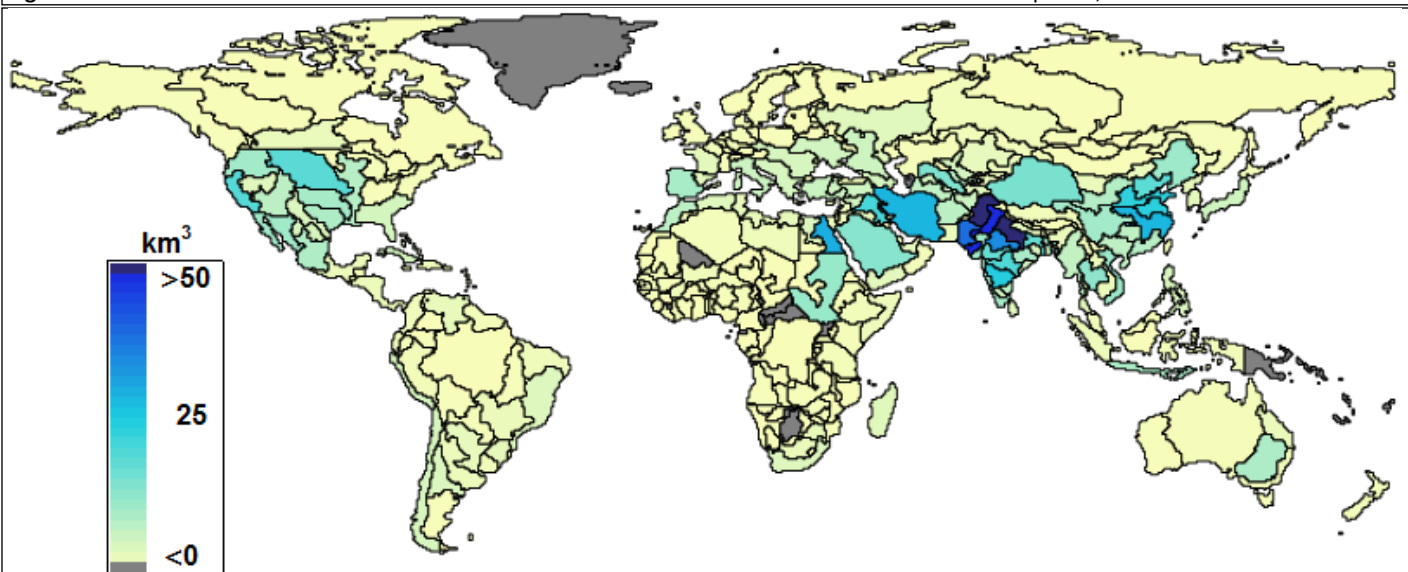

Fig S7: Total PlrrUse for each FPU for the median of all 35 GCM  $\times$  GHM combinations over the historical period, 1980-2010.
